# Supplementary material for: Optimizing oxygen functional groups in graphene quantum dots for improved antioxidant mechanism
Source: Royal Society of Chemistry journal article supplement (doi:10.1039/c8cp06768f), 2018-12-07
Supplement: c8cp06768f1.pdf [file c8cp06768f1.pdf]

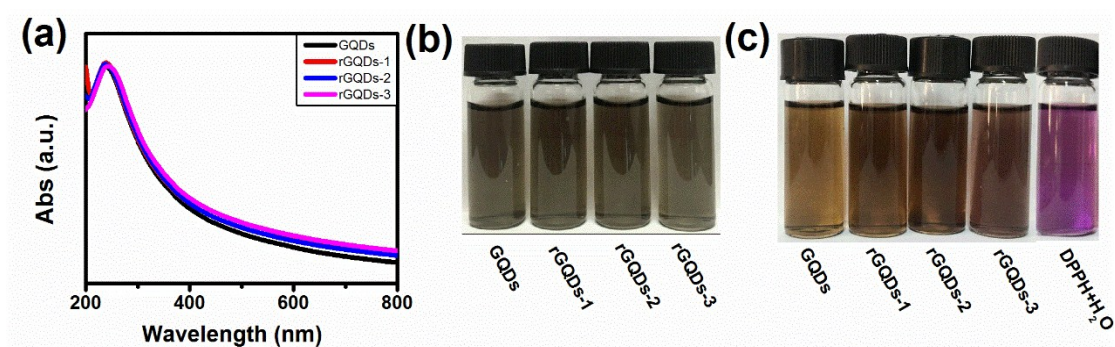

**Fig.S1.** (a) The UV-Vis absorption of different GQDs ; (b) a photograph of GQDs and rGQDs with different level; (c) a photograph of GQDs and rGQDs after scavenging

DPPH• free radical

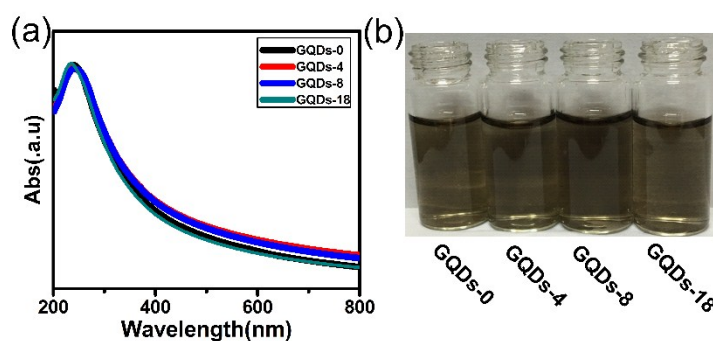

**Fig.S2.** (a) The UV-Vis absorption of different GQDs<sub>0-18</sub>, (b) a photograph (from left to right) is GQDs<sub>0</sub>, GQDs<sub>4</sub>, GQDs<sub>8</sub>, GQDs<sub>18</sub> respectively.

From the UV-Vis absorption spectrum in **Fig.S1 and S2**, it can be seen that, after the concentration adjustment, a similar absorption behavior at ca. 237 nm was shown. This absorption peaks were caused by the transition from  $\pi$  to  $\pi^*$  of carbon-carbon bonds<sup>[1]</sup>.

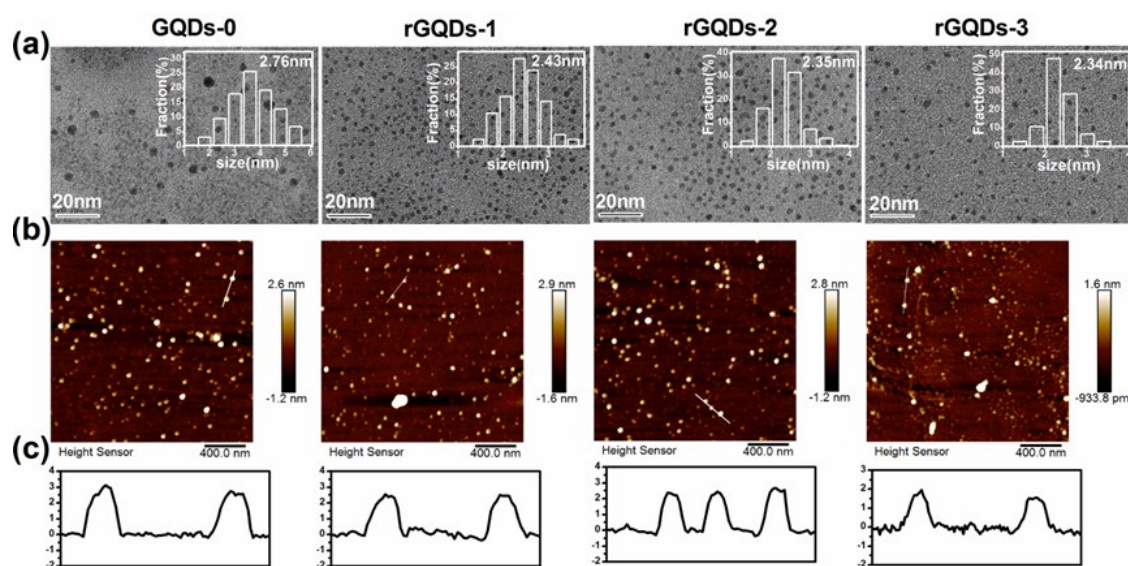

**Fig.S3** (a) TEM images and size distributions (inserts) of GQDs, rGQDs<sub>1</sub>, rGQDs<sub>2</sub>, and rGQDs<sub>3</sub>. (b) AFM image and (c) its height distribution of GQDs, rGQDs<sub>1</sub>, rGQDs<sub>2</sub> and rGQDs<sub>3</sub>.

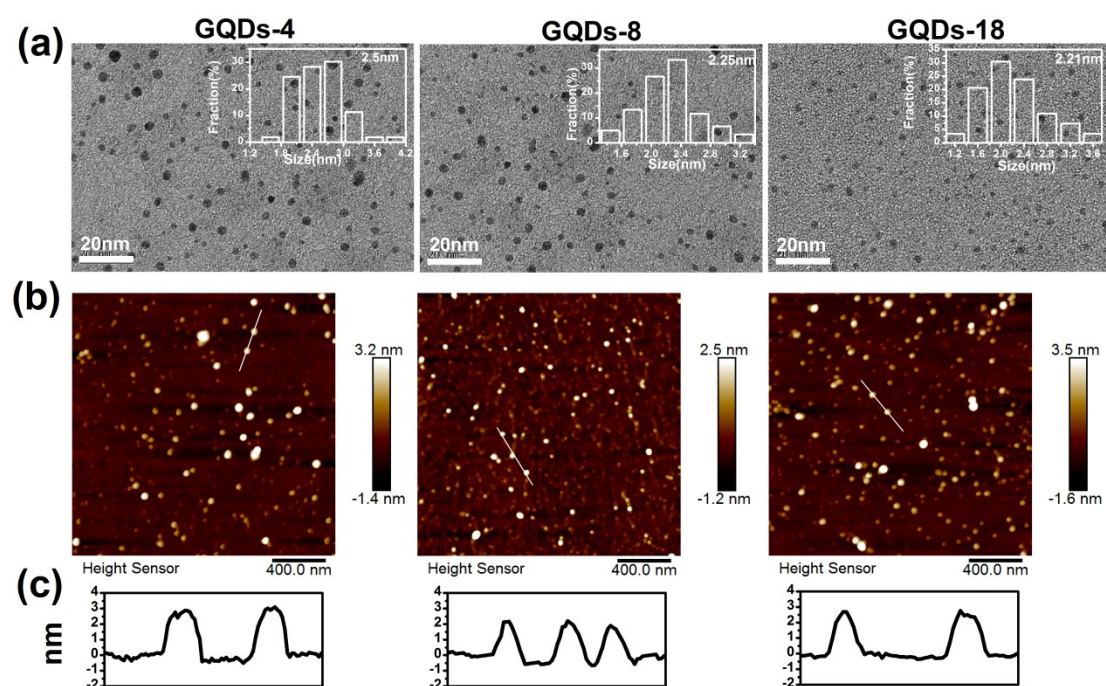

**Fig. S4** (a) TEM images and size distributions (inserts) of GQDs<sub>4</sub>, GQDs<sub>8</sub>, and GQDs<sub>18</sub>. (b) AFM image and (c) its height distribution of GQDs<sub>4</sub>, GQDs<sub>8</sub>, and GQDs<sub>18</sub>.

The TEM and AFM images and their height profiles of each kind of GQDs are shown in **Fig. S3 and S3**, The white dots in **Fig.S3b** and **S4b** represent GQDs and their specific point thickness values are shown in **Fig.S3c**.

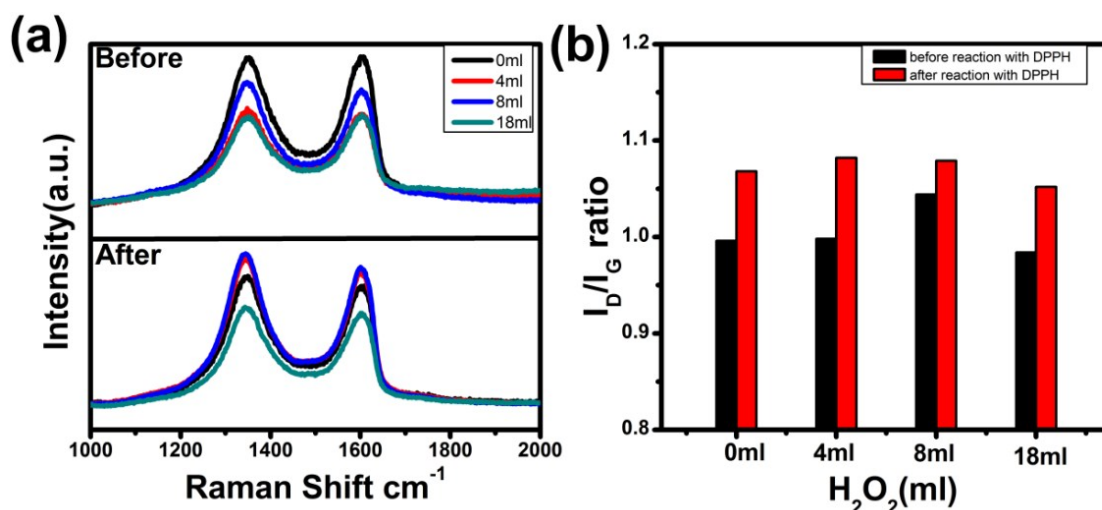

**Fig. S5.** (a) Raman spectra before and after GQDs<sub>0-18</sub> react with DPPH•. (b)  $I_D/I_G$  ratio before and after GQDs<sub>0-18</sub> react with DPPH•.

The Raman spectra of GQDs<sub>0</sub> to GQDs<sub>18</sub> before and after reaction with DPPH• were measured, as shown in **Fig.S5**, to confirm the adduct formation mechanism. Before reaction with DPPH•, the values of  $I_D/I_G$  for four GQDs are 0.996 (GQDs<sub>0</sub>), 0.998 (GQDs<sub>4</sub>), 1.044 (GQDs<sub>8</sub>), 0.984 (GQDs<sub>18</sub>) respectively. After reaction with DPPH• radicals, the values of  $I_D/I_G$  are 1.068 (GQDs<sub>0</sub>), 1.082 (GQDs<sub>4</sub>), 1.079 (GQDs<sub>8</sub>), 1.052 (GQDs<sub>18</sub>), respectively. The values of  $I_D/I_G$  ratio after GQDs reaction with DPPH• radicals are higher than before. This confirms that the grafting of DPPH• on GQDs surface increased defect level of GQDs.

## Reference

- [1] J. Ge, Y. Li, B. Zhang, N. Ma, J. Wang, C. Pu, Y. Xiang, *J Lumin* 2015, **166**, 322-327.
